# Supplementary material for: Synthesis and potent cytotoxic activity of a novel diosgenin derivative and its phytosomes against lung cancer cells
Source: PubMed Central journal article supplement (PMC6774070; doi:10.3762/bjnano.10.189), 2019-09-24
Supplement: Beilstein_J_Nanotechnol-10-1933-s001.pdf [file Beilstein_J_Nanotechnol-10-1933-s001.pdf]

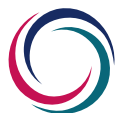

## Supporting Information

for

### **Synthesis and potent cytotoxic activity of a novel diosgenin derivative and its phytosomes against lung cancer cells**

Liang Xu, Dekang Xu, Ziyang Li, Yu Gao and Haijun Chen

*Beilstein J. Nanotechnol.* **2019**, *10*, 1933–1942. doi:10.3762/bjnano.10.189

## Additional experimental information

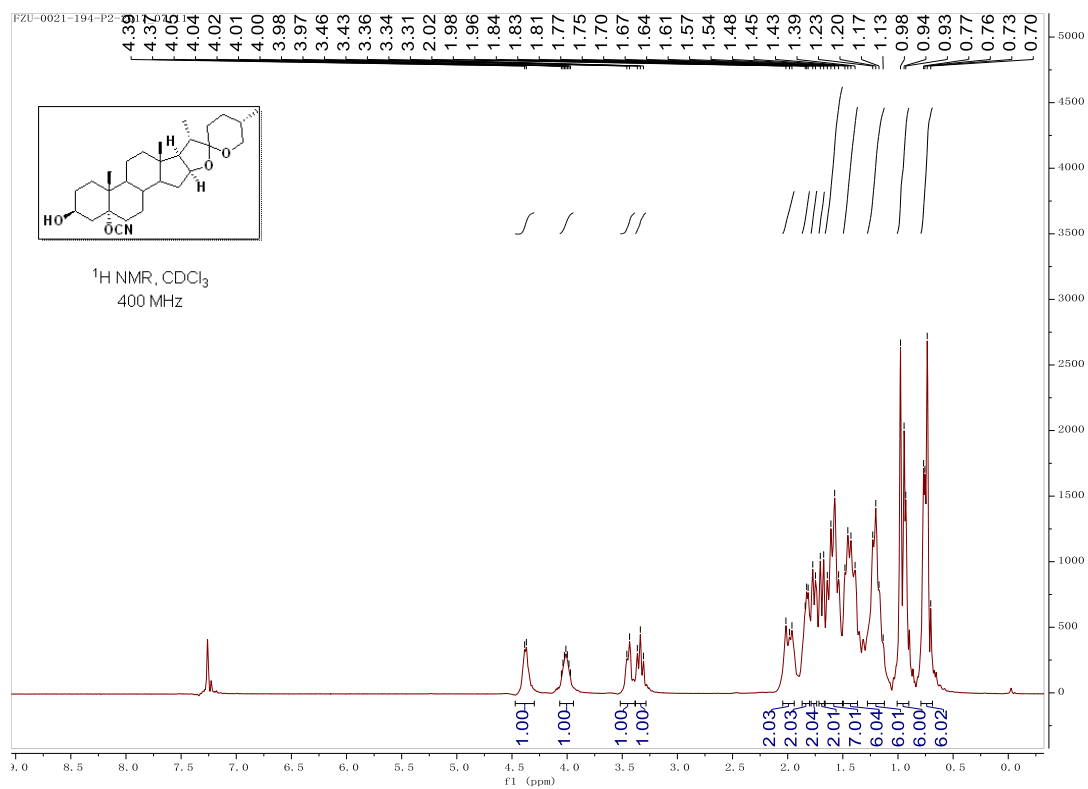

Figure S1:  $^1\text{H NMR}$  spectrum of P2.

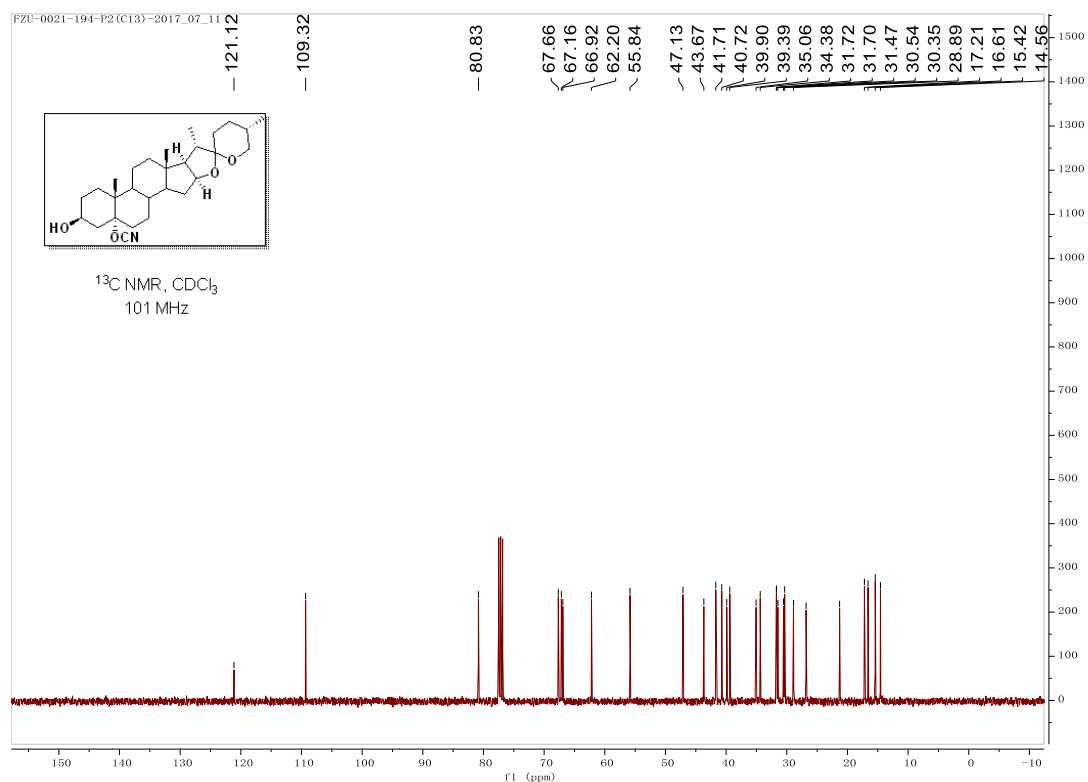

Figure S2:  $^{13}\text{C NMR}$  spectrum of P2.

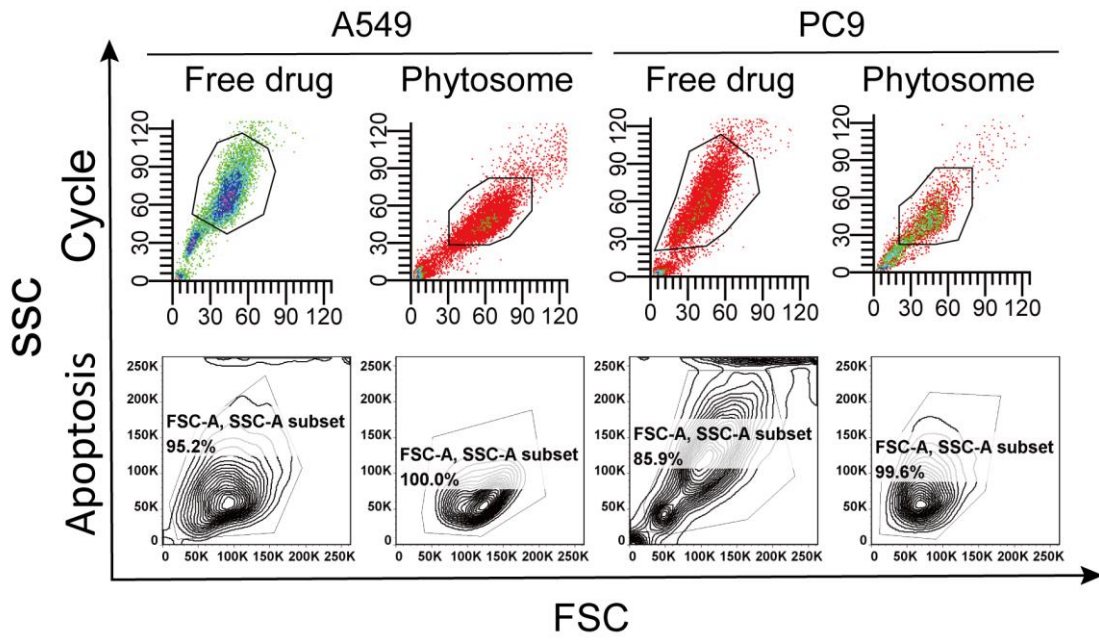

**Figure S3:** The gating for flow cytometry.
